# Supplementary material for: Risk factors for heart failure hospitalizations among patients with atrial fibrillation
Source: PubMed Central journal article supplement (PMC5823079; doi:10.1371/journal.pone.0191736), 2018-02-02
Supplement: pone.0191736.s002.pdf [file pone.0191736.s002.pdf]

Patient number: \_\_\_\_\_

Center: \_\_\_\_\_

Date of birth: \_\_\_\_\_

Initials: SN  N

Sex category:  m  w

**38.00 Medical history**

38.01 When was the patient's first detected atrial fibrillation?  .   
m m j j j j

38.02 How was atrial fibrillation documented? **(Documentation requested!)**  
 12-lead ECG  Holter ECG  Loop recorder / R-Test  PM / ICD  Other

38.03 Current atrial fibrillation type:  paroxysmal  persistent (>7 days, ECV)  permanent

38.04 How often does the patient have episodes of atrial fibrillation? (Please only mark one answer)  
 > 1 x per week  < 1 x per week but > 1 x per month  < 1 x per month  no more episodes

38.05 Mean duration of the episodes?  minutes  hours  days  no more episodes

38.06 Which symptoms related with atrial fibrillation does the patient present?  
 Palpitations  Dizziness  Chest pain  none  
 Dyspnea  Fatigue  Syncope  Others \_\_\_\_\_

38.07 Are there any factors / behaviors that trigger atrial fibrillation in the patient?  
 no  Alcohol  Coffein  Stress  Lack of sleep/Tiredness

**Others** \_\_\_\_\_

38.08 Known atrial flutter?  Yes  No

38.09 H/o. RFA Isthmus?  Yes  No **If so, when:**  .   
m m j j j j

38.10 H/o. electrical cardioversion?  Yes  No **If so:** number

38.11 H/o. PVI?  Yes  No **If so:** number

38.12 H/o. Device implantation?  Yes  No  
**If so, Device type:**  PM  ICD  CRT  CRT-ICD  Loop recorder

**Date of implantation:**  .  .   
d d m m j j j j

38.13 Procedural complications ?  Yes  No **If so, which:** \_\_\_\_\_

**39.00 Anticoagulation/Medication**

39.11 **Aspirin**  Yes  No **Dosis** \_\_\_\_\_ 

|                          |                          |                          |
|--------------------------|--------------------------|--------------------------|
| morning                  | noon                     | evening                  |
| <input type="checkbox"/> | <input type="checkbox"/> | <input type="checkbox"/> |

39.12 **OAC**  Yes  No **If so, which:** \_\_\_\_\_ 

|                          |                          |                          |
|--------------------------|--------------------------|--------------------------|
| morning                  | noon                     | evening                  |
| <input type="checkbox"/> | <input type="checkbox"/> | <input type="checkbox"/> |

39.13 **Anti-platelet medication**  Yes  No **If so, which:** \_\_\_\_\_ 

|                          |                          |                          |
|--------------------------|--------------------------|--------------------------|
| morning                  | noon                     | evening                  |
| <input type="checkbox"/> | <input type="checkbox"/> | <input type="checkbox"/> |

39.14 **Medication 1** Name: \_\_\_\_\_ **Dosis** \_\_\_\_\_ 

|                          |                          |                          |
|--------------------------|--------------------------|--------------------------|
| morning                  | noon                     | evening                  |
| <input type="checkbox"/> | <input type="checkbox"/> | <input type="checkbox"/> |

39.15 **Medication 2** Name: \_\_\_\_\_ **Dosis** \_\_\_\_\_ 

|                          |                          |                          |
|--------------------------|--------------------------|--------------------------|
| morning                  | noon                     | evening                  |
| <input type="checkbox"/> | <input type="checkbox"/> | <input type="checkbox"/> |

39.16 **Medication 3** Name: \_\_\_\_\_ **Dosis** \_\_\_\_\_ 

|                          |                          |                          |
|--------------------------|--------------------------|--------------------------|
| morning                  | noon                     | evening                  |
| <input type="checkbox"/> | <input type="checkbox"/> | <input type="checkbox"/> |

39.17 **Medication 4** Name: \_\_\_\_\_ **Dosis** \_\_\_\_\_ 

|                          |                          |                          |
|--------------------------|--------------------------|--------------------------|
| morning                  | noon                     | evening                  |
| <input type="checkbox"/> | <input type="checkbox"/> | <input type="checkbox"/> |

39.18 **Medication 5** Name: \_\_\_\_\_ **Dosis** \_\_\_\_\_ 

|                          |                          |                          |
|--------------------------|--------------------------|--------------------------|
| morning                  | noon                     | evening                  |
| <input type="checkbox"/> | <input type="checkbox"/> | <input type="checkbox"/> |

39.19 **Medication 6** Name: \_\_\_\_\_ **Dosis** \_\_\_\_\_ 

|                          |                          |                          |
|--------------------------|--------------------------|--------------------------|
| morning                  | noon                     | evening                  |
| <input type="checkbox"/> | <input type="checkbox"/> | <input type="checkbox"/> |

39.20 Which antiarrhythmic medication has the patient already been prescribed?  
 none  Flecainide  Propafenon  Sotalol  Amiodaron  Dronedaron  others  
When was the medication stopped?  Reason for discontinuation: \_\_\_\_\_

39.30 **Regular drug consumption?**  Yes  No  
**If so, what kind of drug:**  Cocaine  Heroin  Marijuana  Ecstasy  LSD  others

Patient number: \_\_\_\_\_

Date of birth: \_\_\_\_\_

Sex category:  m  w

Center: \_\_\_\_\_

Initials: SN  N

40.00 Diseases

- 40.01 H/o. myocardial infarction  Yes  No
- 40.02 H/o. CAB  Yes  No
- 40.03 H/o. valve surgery  Yes  No
- 40.04 H/o. PCI / Stent  Yes  No
- 40.05 H/o. Stroke / TIA  Yes  No
- 40.06 Other embolism/vascular occlusion  Yes  No
- 40.07 Known heart failure  Yes  No
- 40.08 Obstructive sleep apnea syndrome  Yes  No
- 40.09 Hypertension  Yes  No
- 40.10 Diabetes mellitus  Yes  No
- 40.11 Peripheral artery occlusive disease  Yes  No
- 40.12 Renal failure  Yes  No
- 40.13 Hyperthyroidism  Yes  No
- 40.14 Hypothyroidism  Yes  No
- 40.15 H/o. pulmonary embolism/DVT  Yes  No
- 40.16 Known malignancy  Yes  No
- 40.17 H/o. major bleeding  Yes  No

Which: \_\_\_\_\_

If so:  intracranial  gastrointestinal  other, requiring of blood transfusion  others

- 40.18 Gastric ulcer  Yes  No
- 40.19 Recurrent falls  Yes  No
- 40.20 Other serious diseases  Yes  No

If so, organ: \_\_\_\_\_

(e.g. gastrointestinal, nervous system, liver, etc.)

If so, which: \_\_\_\_\_

41.00 Proportion of INR values in the target range  /  (over  weeks)

42.00 Family history

42.10 Does a member of the patient's family suffer from atrial fibrillation?

- 42.11 **Father atrial fibrillation**  unknown  No  Yes **diagnosed at the age of:**  years
- 42.12 **Brother atrial fibrillation**  unknown  No  Yes **diagnosed at the age of:**  years
- 42.13 **Mother atrial fibrillation**  unknown  No  Yes **diagnosed at the age of:**  years
- 42.14 **Sister atrial fibrillation**  unknown  No  Yes **diagnosed at the age of:**  years

42.20 Is there a known family burden for the following diseases?

- 42.21 **Hypertension**  unknown  No  Yes
- 42.22 **Diabetes mellitus**  unknown  No  Yes
- 42.23 **Overweight**  unknown  No  Yes
- 42.24 **CAD**  unknown  No  Yes

43.00 Physical examination

- 43.10 Peripheral edema  Yes  No
- 43.20 Rales  Yes  No

Baseline - Data

**Beat - AF**

Patient number: \_\_\_\_\_

Center: \_\_\_\_\_

Date of birth: \_\_\_\_\_

Initials: SN  N

Sex category:  m  w

44.00 Preliminary examinations [Check-List]

|                             |                          |       |                                                                                                                                                                             |
|-----------------------------|--------------------------|-------|-----------------------------------------------------------------------------------------------------------------------------------------------------------------------------|
| 44.10 ECG done              | <input type="checkbox"/> | Date: | <input type="text"/> <input type="text"/> . <input type="text"/> <input type="text"/> . <input type="text"/> <input type="text"/> <input type="text"/> <input type="text"/> |
|                             |                          |       | <i>d d m m j j j j</i>                                                                                                                                                      |
| 44.20 Holter-ECG done       | <input type="checkbox"/> | Date: | <input type="text"/> <input type="text"/> . <input type="text"/> <input type="text"/> . <input type="text"/> <input type="text"/> <input type="text"/> <input type="text"/> |
|                             |                          |       | <i>d d m m j j j j</i>                                                                                                                                                      |
| 44.30 Echocardiography done | <input type="checkbox"/> | Date: | <input type="text"/> <input type="text"/> . <input type="text"/> <input type="text"/> . <input type="text"/> <input type="text"/> <input type="text"/> <input type="text"/> |
|                             |                          |       | <i>d d m m j j j j</i>                                                                                                                                                      |
| 44.40 Blood sampling        | <input type="checkbox"/> | Date: | <input type="text"/> <input type="text"/> . <input type="text"/> <input type="text"/> . <input type="text"/> <input type="text"/> <input type="text"/> <input type="text"/> |
|                             |                          |       | <i>d d m m j j j j</i>                                                                                                                                                      |

45.00 Vital signs

|                                                 |                                                                |                  |
|-------------------------------------------------|----------------------------------------------------------------|------------------|
| 45.10 Height                                    | <input type="text"/> <input type="text"/> <input type="text"/> | <i>cm</i>        |
| 45.20 Body weight                               | <input type="text"/> <input type="text"/> <input type="text"/> | <i>kilograms</i> |
| 45.30 Heart rate [manually over 30 seconds]     | <input type="text"/> <input type="text"/> <input type="text"/> | <i>bpm</i>       |
| 45.40 Heart rate [ECG]                          | <input type="text"/> <input type="text"/> <input type="text"/> | <i>bpm</i>       |
| 45.50 Blood pressure - systolic, laid down [1]  | <input type="text"/> <input type="text"/> <input type="text"/> | <i>mmHg</i>      |
| 45.60 Blood pressure - diastolic, laid down [1] | <input type="text"/> <input type="text"/> <input type="text"/> | <i>mmHg</i>      |
| 45.70 Blood pressure - systolic, laid down [2]  | <input type="text"/> <input type="text"/> <input type="text"/> | <i>mmHg</i>      |
| 45.80 Blood pressure - diastolic, laid down [2] | <input type="text"/> <input type="text"/> <input type="text"/> | <i>mmHg</i>      |

46.00 | Remarks
